# Supplementary material
Source: publisher figshare collection journal article supplement (https://gsapubs.figshare.com/ndownloader/files/22743632)
Supplement: Supplementary file 1 [file 22743632]

**DATA REPOSITORY ITEM 2002052****Estimation of crustal deformation rates from earthquake statistics****METHOD**

Crustal deformation rates can be related to earthquake rates through seismic moment rates. We use the approach presented by Anderson (1979) and Hyndman and Weichert (1983), which assumes that the seismicity follows a Gutenberg-Richter recurrence relation up to a maximum magnitude. This method requires to estimate both the maximum magnitude and the form of the recurrence curve close to the maximum magnitude. We assume that the maximum magnitude limit is an abrupt truncation in the earthquake density function (i.e. no characteristic earthquakes). The estimation of crustal deformation rates from earthquake catalogue statistics follows four main steps.

**1) Frequency-magnitude (Gutenberg-Richter) distribution**

We use a catalogue composed of ~1500 earthquakes,  $M_L = 3$  and above, from 1907 to 2000. We use the statistical approach developed by Weichert (1980) for completeness of the catalogue varying with magnitude. The frequency-magnitude relation is:

$$\log(N) = a - b M_L$$

where  $N$  is the cumulative number of events per yr for a given magnitude  $M_L$ , and  $a$  and  $b$  are the distribution parameters solved for.  $a$  and  $b$  are mostly constrained by the small magnitudes. Their uncertainties follow a Poisson distribution.

**2) Magnitude to moment**

Magnitude rates are converted to moment rates using an empirical relation (Hanks and Kanamori, 1979). Magnitudes in our catalogue are local magnitude  $M_L$ , for which the conversion to moment  $M_0$  is given by:

$$\log(M_0) = 9.05 + 1.5 M_L$$

### 3) Total moment rate

The total moment rate  $M_0'$  is estimated by integrating the magnitude-frequency distribution up to the assumed maximum magnitude  $M_X$ :

$$M_0' = b \cdot 10^{(1.5-b) M_X + a + 9.05} / (1.5 - b)$$

### 4) Moment rate to deformation rate

The seismic slip rate  $s'$  on a fault is proportional to the rate of seismic moment release  $M_0'$  per unit time and per unit fault area:

$$s' = M_0' / (\mu A)$$

where  $\mu$  is the shear modulus. Assuming that the seismicity is accommodated along a characteristic fault type, the overall deformation rate  $d'$  is:

$$d' = C M_0' / (2 \mu A')$$

where  $A'$  is the cross section area in a plane parallel to the main fault direction and  $C$  depends on the type and orientation of faulting with respect to the regional motion; for a strike-slip fault  $C = 0.5$ , and for a thrust fault  $C = 0.75-1$  (c.f., Anderson, 1979; Molnar, 1979).

## APPLICATION TO THE MACKENZIE AND RICHARDSON MOUNTAINS

We use  $C = 1$  (thrust fault) and  $C = 0.5$  (strike-slip fault) in the Mackenzie and Richardson Mountains, respectively, based on the dominant earthquake focal mechanisms and the structural style in each belt. The cross section area is calculated assuming a seismic thickness of 10-15 km, based on local studies of earthquake depth distribution (Wetmiller et al., 1988; Cassidy and Bent, 1993). This maximum seismogenic depth is supported by our thermal model, which indicates a temperature of 350 °C at ~15 km depth.

We choose the maximum magnitude for the Mackenzie and Richardson Mountains region using the maximum fault area in each region and an empirical relation between magnitude  $M$  and fault area  $A$  (Wells and Coppersmith, 1994):

$$\log(A) = -4.07 + 1.0 M$$

In the Mackenzie Mountains, the main structure is the Plateau fault, a westward dipping thrust with a trace ~270 km long (Gabrielse, 1991). The largest earthquakes in this region correspond to thrust mechanisms along ~30° dipping faults (Wetmiller et al., 1988). Given a seismic thickness of 12 km, the rupture area for an earthquake along a 250 km long, 30° dipping thrust is 6000 km<sup>2</sup>, implying a maximum magnitude  $M_X \sim 7.8$ . In the Richardson Mountains, the largest events are associated with 50-70° dipping strike-slip faults. No direct estimate of the maximum fault length is available for this region, thus we choose a length of 200 km based on the N-S extent of the seismicity. With a 12 km seismic thickness, this leads to a maximum rupture area of ~2800 km<sup>2</sup> and a maximum magnitude  $M_X \sim 7.5$ .

We estimate the range of possible deformation rates using the following range of parameters:  $C = 1$ ,  $M_X = 7.5-8.0$ , thickness = 10-15 km for the Mackenzie Mountains; and  $C = 0.5$ ,  $M_X = 7.2-7.8$ , thickness = 10-15 km for the Richardson Mountains. The statistical uncertainties on the deformation rate estimates are 0.3-0.7 mm/yr. We obtain 2.0-5.6 mm/yr of shortening for the southern Mackenzie region, 3.1-7.2 mm/yr of shortening for the northwestern Mackenzie, and 2.2-7.7 mm/yr of strike-slip for the central Richardson region. If we use the largest historical earthquake in each region to constrain  $M_X$ , the deformation rates are significantly lower: 1.3 mm/yr ( $M_X = 6.9$ ), 0.8 mm/yr ( $M_X = 6.6$ ), and 1.0 mm/yr ( $M_X = 6.6$ ), respectively.

## REFERENCES CITED

- Anderson, J.G., 1979, Estimating the seismicity from geological structure for seismic hazard studies: *Seismological Society of America Bulletin*, v. 69, p. 205-214.
- Cassidy, J.F., and Bent, A.L., 1993, Source parameters of the 29 May and 5 June 1940 Richardson mountains earthquakes: *Seismological Society of America Bulletin*, v. 83, p. 636-659.
- Gabrielse, H., compiler, 1991, Structural styles, *in* Gabrielse, H., and Yorath, C.J., eds., *Geology of the Cordilleran orogen in Canada*: Boulder, Colorado, Geological Society

of America, *Geology of North America*, v. G2, p. 571-675.

Hanks, T.C., and Kanamori, H., 1979, A moment magnitude scale: *Journal of Geophysical Research*, v. 84, p. 2348-2350.

Hyndman, R.D., and Weichert, D.H., 1983, Seismicity and rates of relative motion on the plate boundaries of western North America: *Geophysical Journal of the Royal Astronomical Society*, v. 72, p. 59-82.

Molnar, P., 1979, Earthquake recurrence interval and plate tectonics: *Seismological Society of America Bulletin*, v. 69, 115-133.

Weichert, D.H., 1980, Estimation of the earthquake recurrence parameters from unequal observation periods for different magnitudes: *Seismological Society of America Bulletin*, v. 70, p. 1337-1346.

Wells, D.L., and Coppersmith, K.J., 1994, New empirical relationships among magnitude, rupture length, rupture width, rupture area, and slip displacement: *Seismological Society of America Bulletin*, v. 84, 974-1002.

Wetmiller, R.J., Horner, R.B., Hasegawa, H.S., North, R.G., Lamontagne, M., Weichert, D.H., and Evans, S.G., 1988, An analysis of the 1985 Nahanni earthquakes, *Seismological Society of America Bulletin*, v. 78, p. 590-616.
